# Supplementary material for: Facile synthesis of amorphous aluminum vanadate hierarchical microspheres for supercapacitors
Source: Royal Society of Chemistry journal article supplement (doi:10.1039/c6qi00089d), 2016-01-01
Supplement: c6qi00089d1.pdf [file c6qi00089d1.pdf]

### Supplementary Information

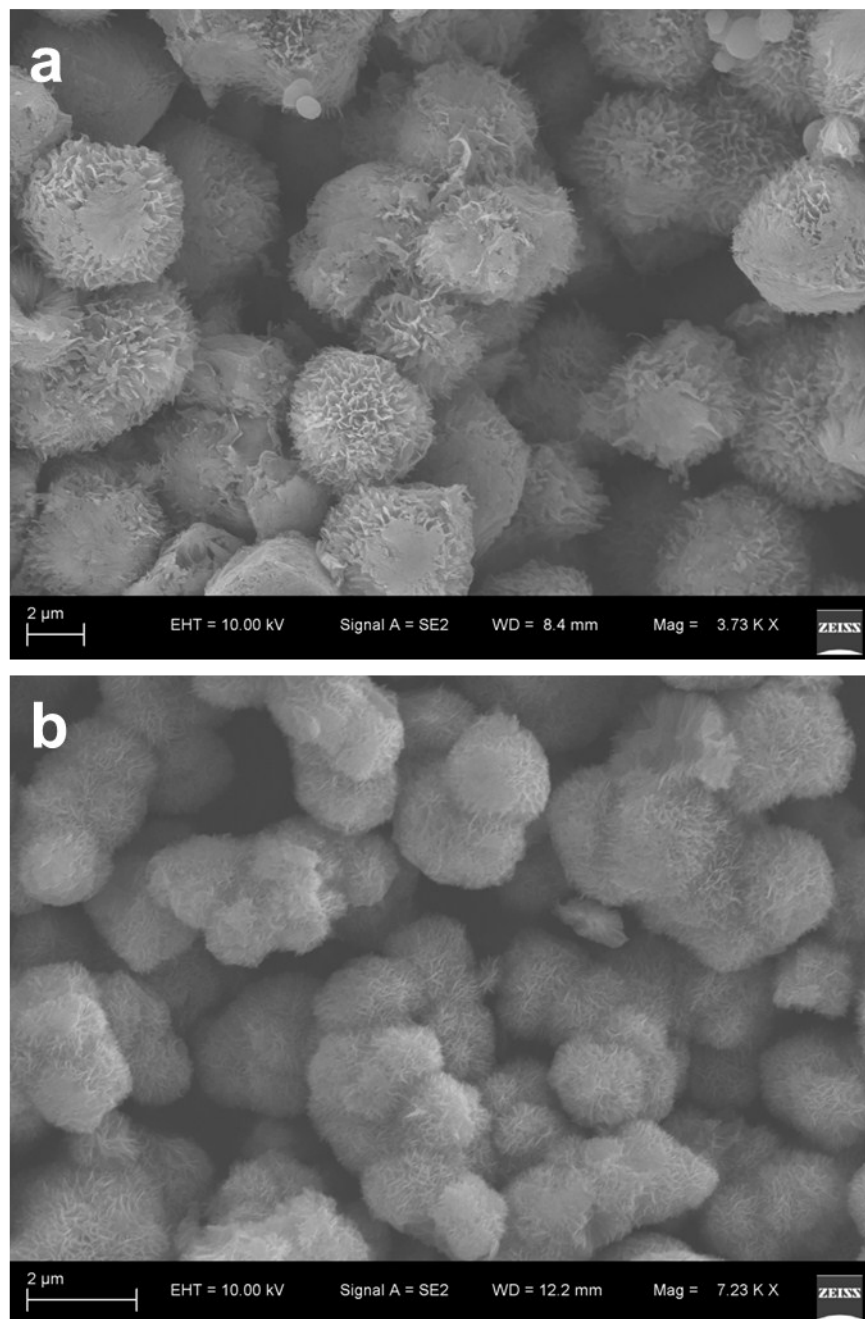

**Fig. S1** The FRSEM images of the samples of sample which was modified by SDS (a) and CTAB (b), other conditions are the same as the PVP.

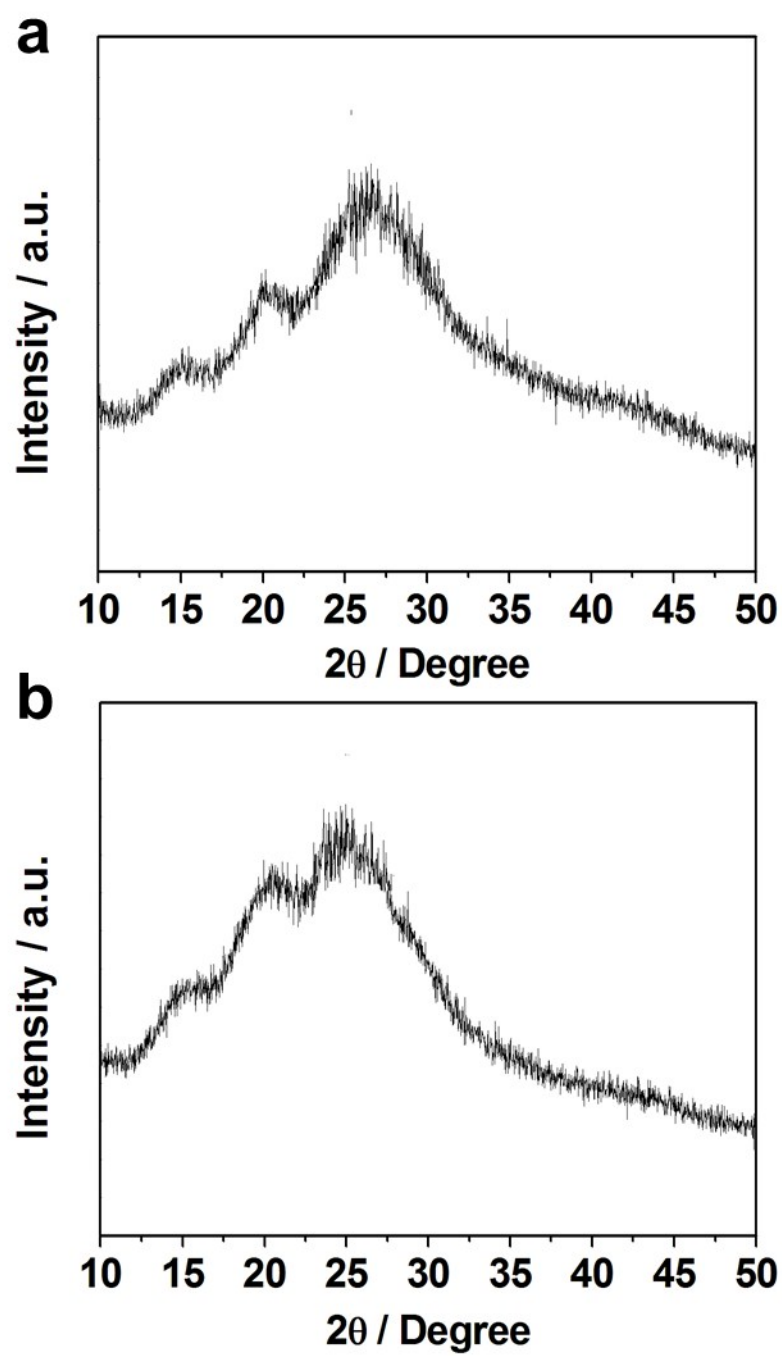

**Fig. S2** The XRD patterns of the samples of sample which was modified by SDS (a) and CTAB (b), other conditions are the same as the PVP.

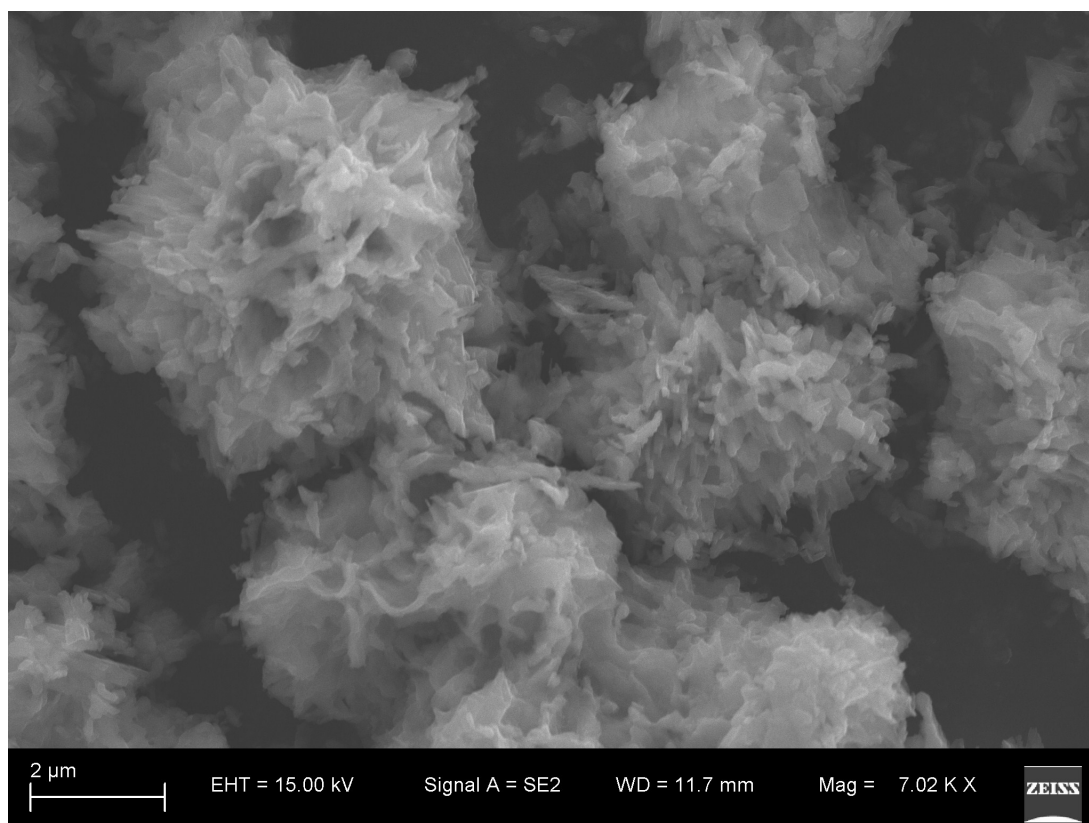

**Fig. S3** The SEM image of the samples obtained after the 10000 cycle life testing.
